# Supplementary material for: Immunoglobulin adsorption and film formation on mechanically wrinkled and crumpled surfaces at submonolayer coverage
Source: Royal Society of Chemistry journal article supplement (doi:10.1039/d3na00033h), 2023-01-01
Supplement: d3na00033h1.pdf [file d3na00033h1.pdf]

## Supporting Information

### Immunoglobulin Adsorption and Film Formation on Mechanically Wrinkled and Crumpled Surfaces at Submonolayer Coverage

Matthew T. Gole,<sup>a</sup> Mohan T. Dronadula,<sup>b</sup> Narayana R. Aluru,<sup>b</sup> Catherine J. Murphy<sup>a\*</sup>

<sup>a</sup>. Department of Chemistry, University of Illinois Urbana-Champaign, Urbana, IL, 61801, USA

<sup>b</sup>. Walker Department of Mechanical Engineering, The University of Texas at Austin, Austin, Texas, 78712, USA

\*Corresponding author: [murphycj@illinois.edu](mailto:murphycj@illinois.edu)

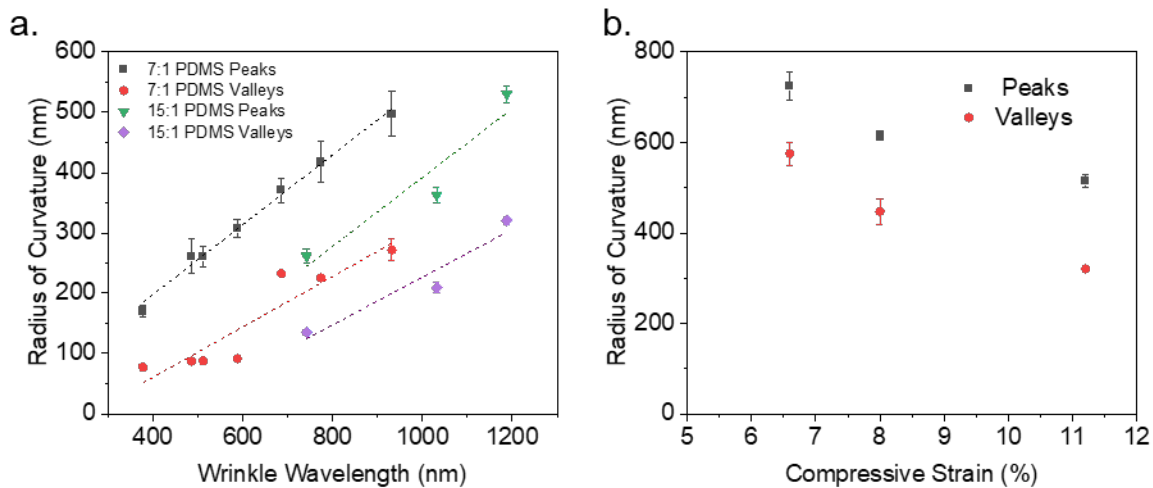

**Figure S1.** (a) Radii of curvature data from figure 1c with the addition of 3 samples fabricated with a PDMS base:curing agent ratio of 7:1. (b) Radii of curvature for 3 samples with wrinkle wavelength of 1200 nm under different degrees of compressive strain.

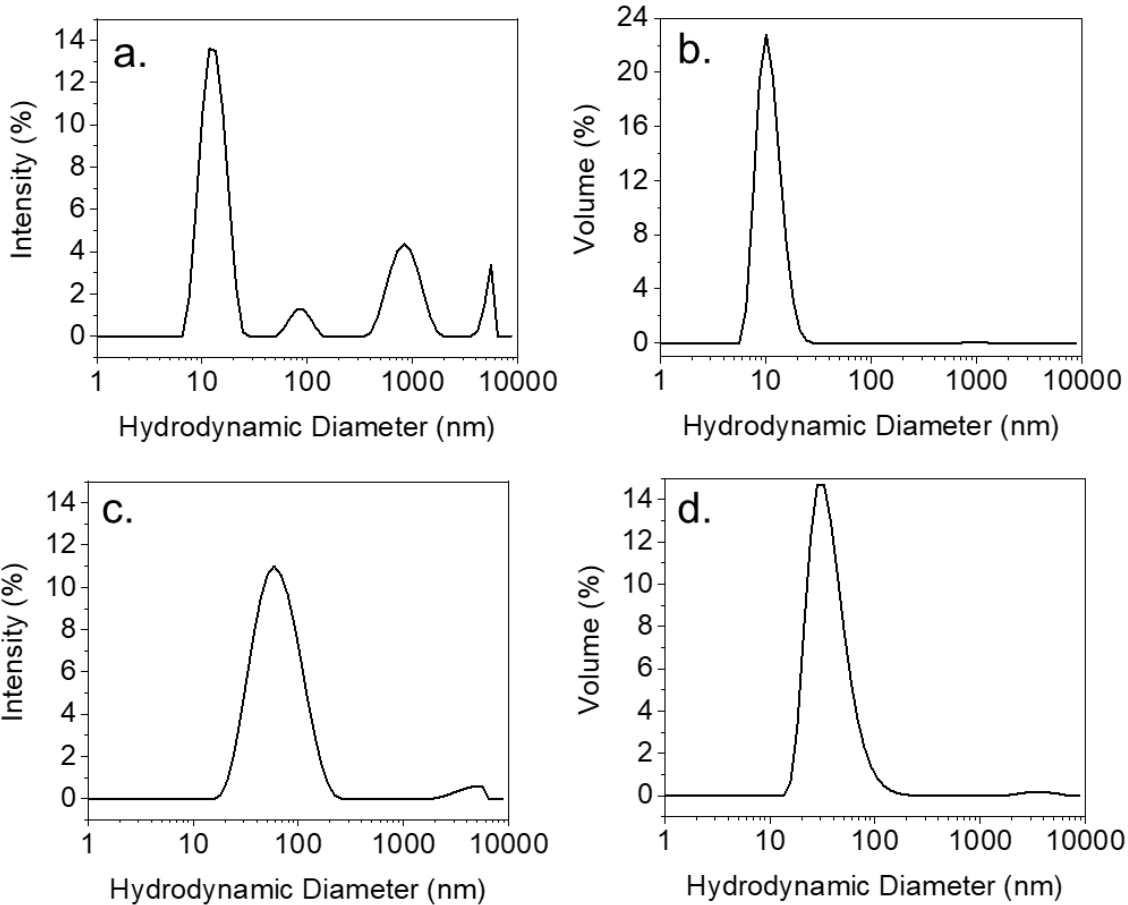

**Figure S2.** DLS distribution of IgG in intensity % (a) and volume % (b), and IgM in intensity % (c) and volume % (d). Though the presence of aggregates are detected by intensity %, these plots are skewed by higher sensitivity to large particles. Volume % plots are less sensitive to small amounts of aggregates and show the protein solutions are mainly single protein molecules.

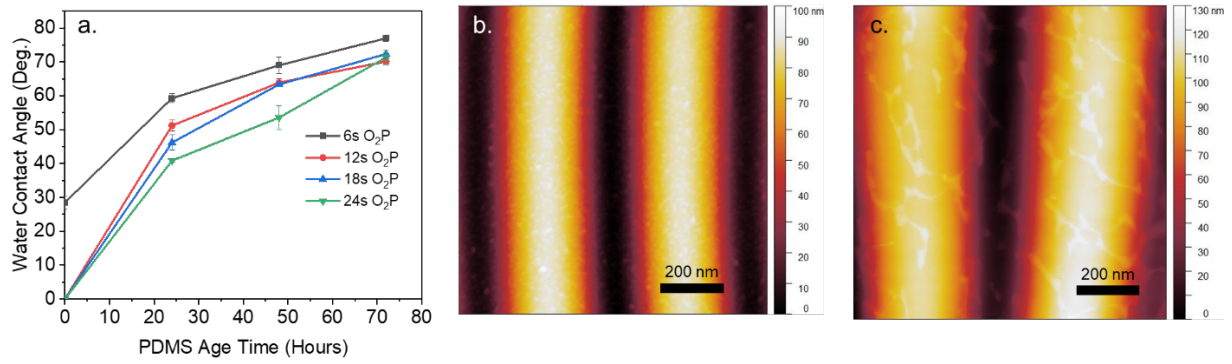

**Figure S3.** Evolution of water contact angle measurements of plasma treated PDMS samples over time since plasma treatment for different lengths of O<sub>2</sub> plasma (O<sub>2</sub>P) (a). IgG adsorbed to a wrinkled PDMS sample within 3 hours of plasma treatment (b), and 3 days after plasma treatment (c). The fresh sample shows electrostatic stabilization of the protein, while the aged sample exhibits merging and network formation due to the hydrophobic effect.

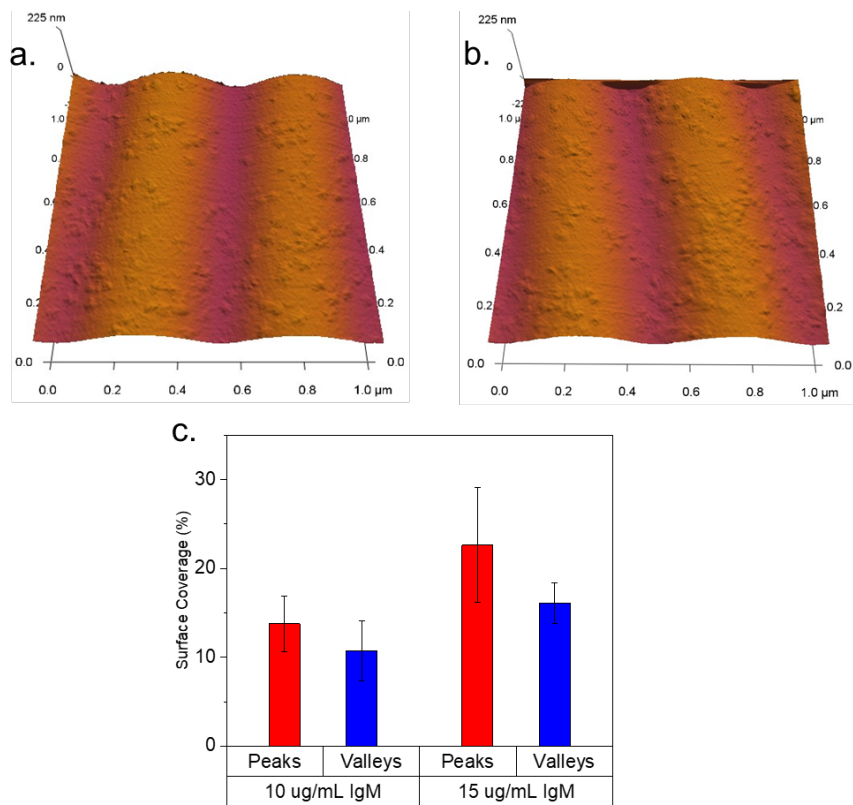

**Figure S4.** Liquid AFM topography of (a) 10 µg/mL and (b) 15 µg/mL IgM on wrinkled PDMS in 0.1 mM PBS buffer, pH 7.4. (c) Corresponding peak and valley surface coverages averaged over 3 images each.

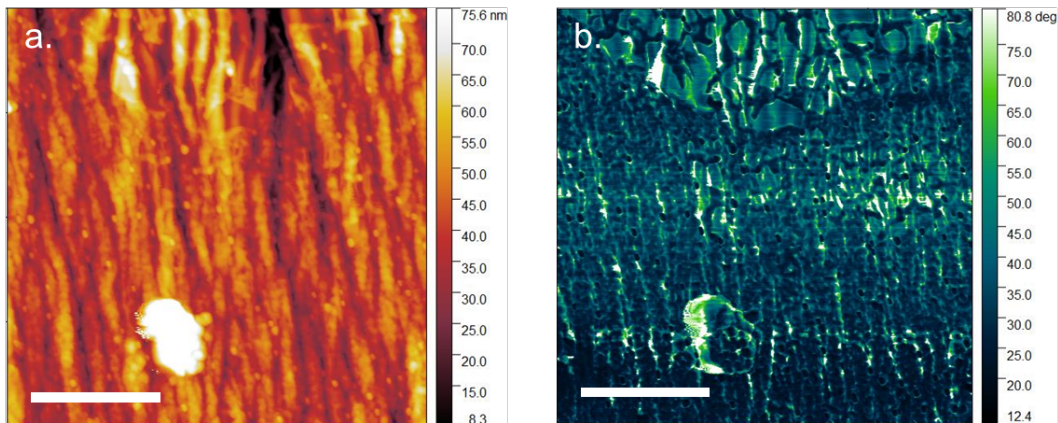

**Figure S5.** (a) AFM topography and (b) phase contrast of IgM adsorbed to crumpled graphene. Visible at the top of the image is protein network formation with a curved boundary, indicating a drying front with water thin film formation despite surface roughness. Scale bars 500 nm.

|                | <b>Binding energy (E)</b> | <b>Energy differences (<math>\Delta E</math>)</b> |
|----------------|---------------------------|---------------------------------------------------|
| <b>Concave</b> | $-2869.1 \pm 14$          | 82.25                                             |
| <b>Flat</b>    | $-2786.85 \pm 11$         |                                                   |
| <b>Convex</b>  | $-2760.8 \pm 9$           | 26.05                                             |

**Table S1.** IgG/silica adsorption energies in kJ/mol. Energy differences ( $\Delta E$ ) were computed as the deviations with respect to the flat case.
